# Supplementary material for: INSIGHT responsive parenting intervention reduces infant’s screen time and television exposure
Source: PubMed Central journal article supplement (PMC5855973; doi:10.1186/s12966-018-0657-5), 2018-03-15

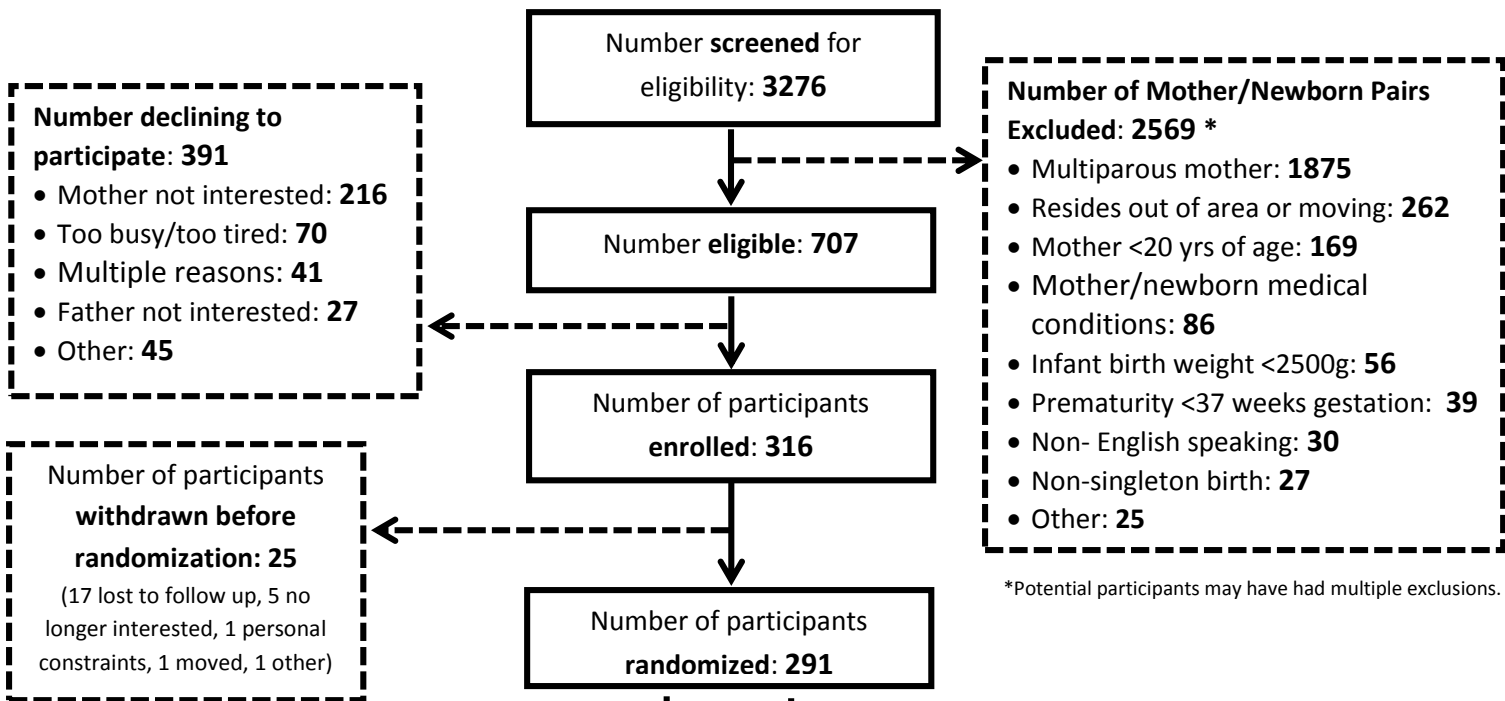

**Intervention Begins**

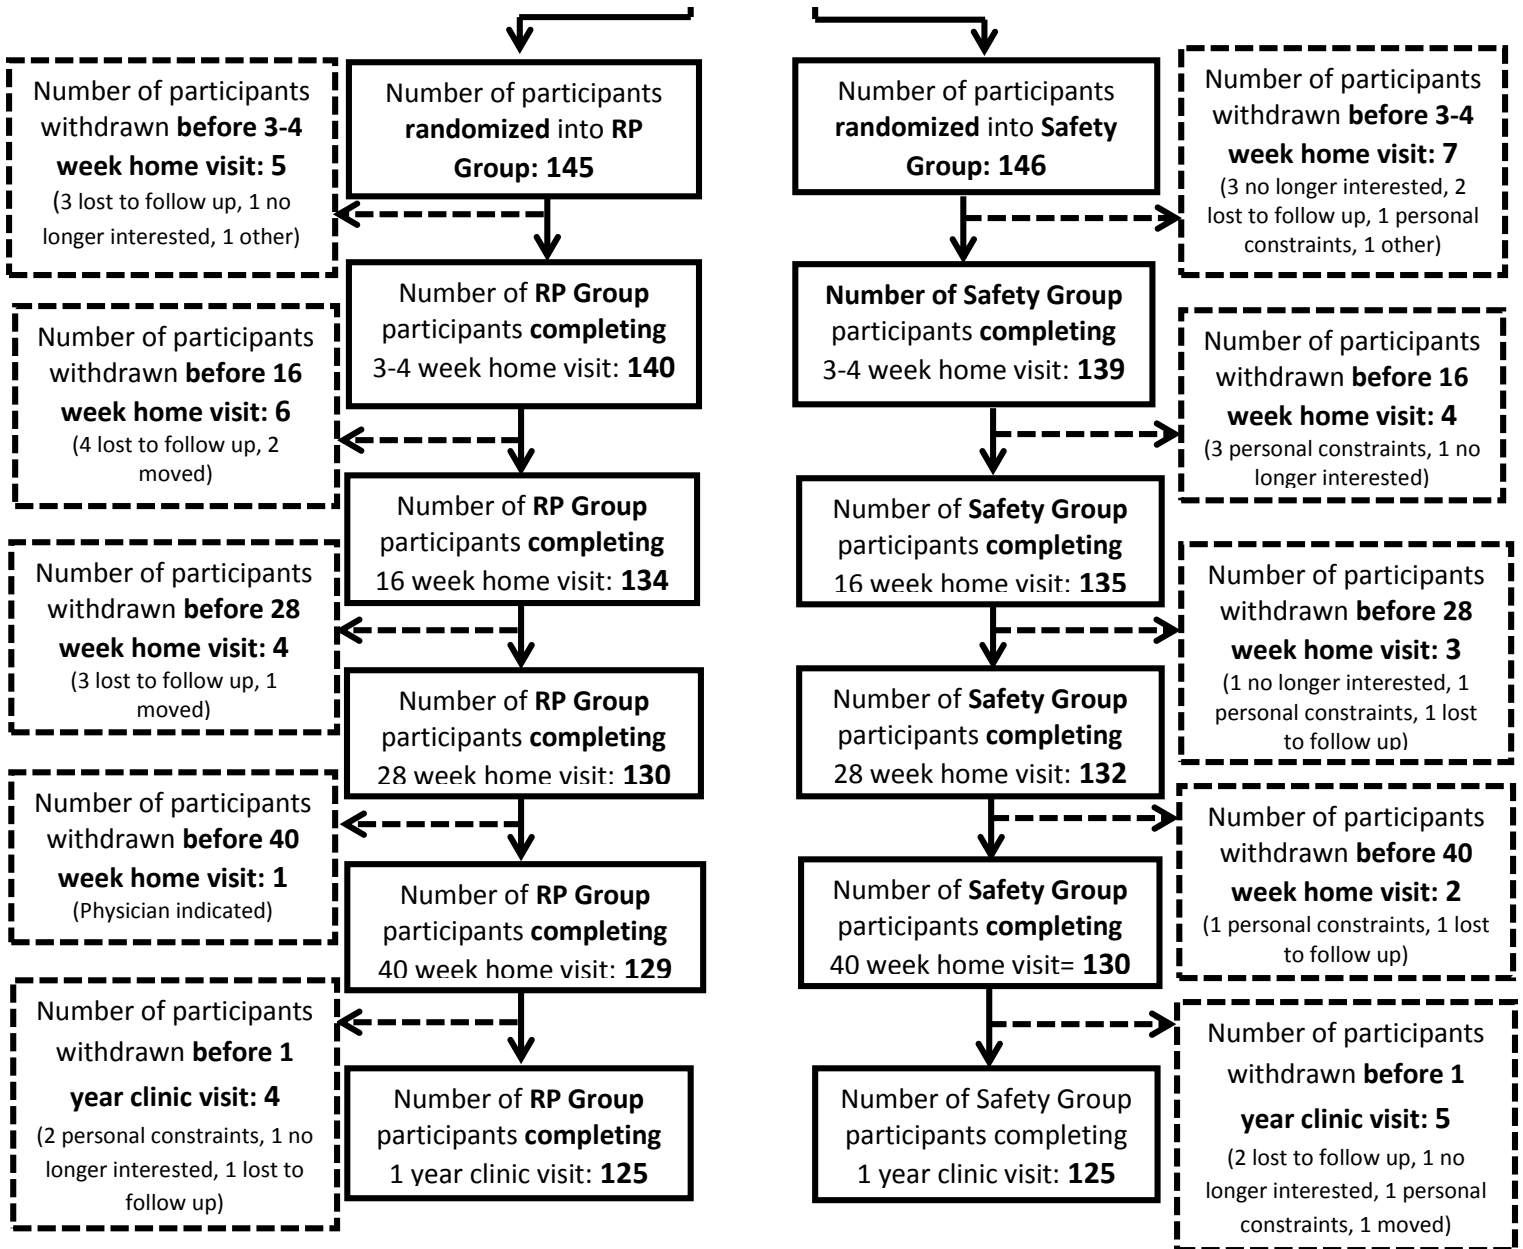

Supplement: 12966_2018_657_MOESM1_ESM.pdf [file 12966_2018_657_MOESM1_ESM.pdf]
